# Supplementary material for: A Comparison of the Impact of Restrictive Diets on the Gastrointestinal Tract of Mice
Source: MDPI journal article supplement (doi:10.3390/nu14153120), 2022-07-29
Supplement: s1 [file s1]

## Supplementary figures

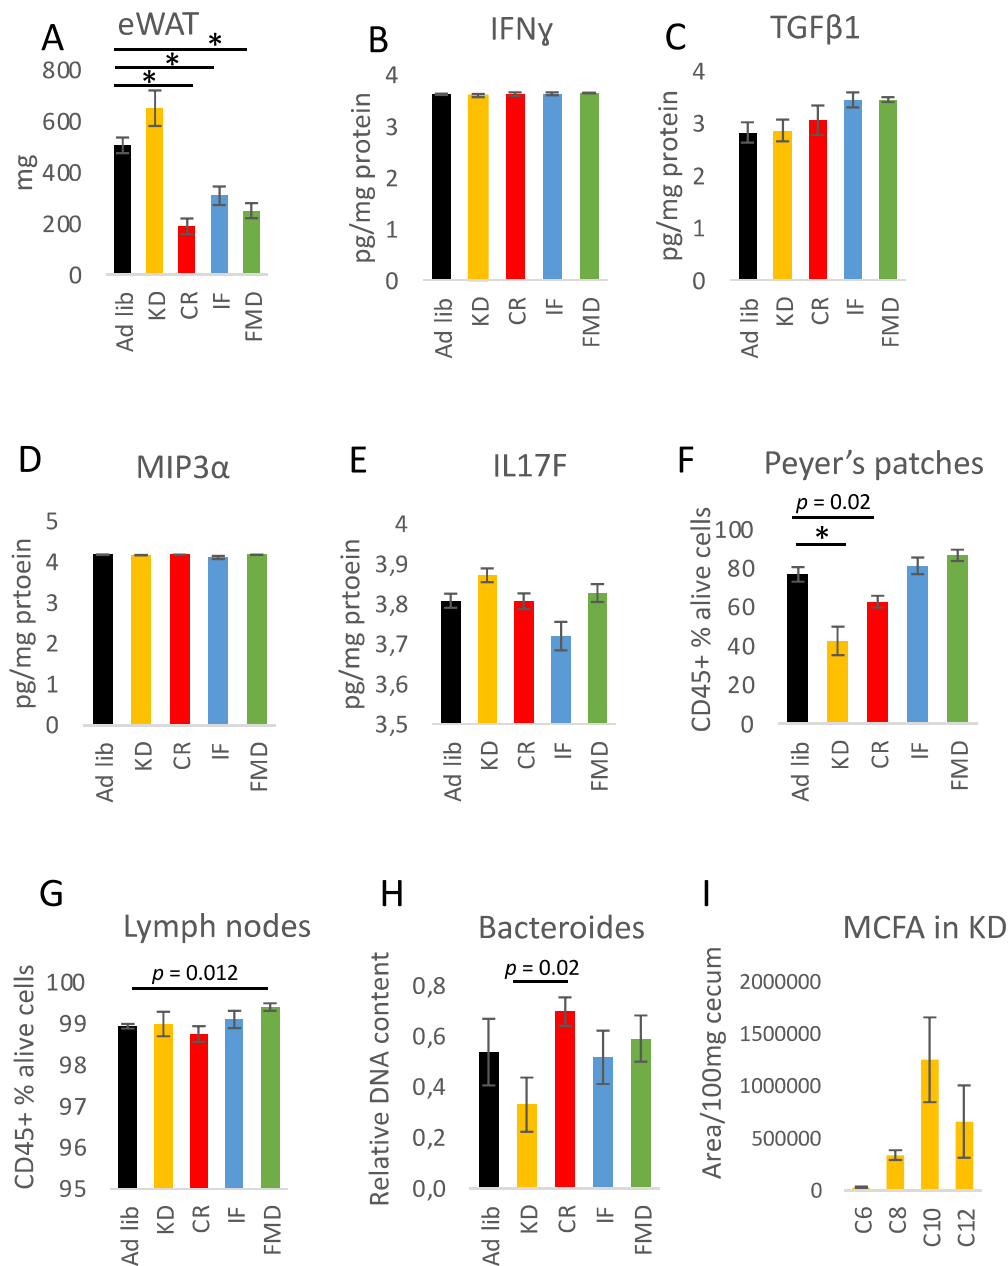

**Supplementary figure S1. WAT weight, protein expression, cells abundance, Bacteroides abundance, and MCFA levels.** The weight of epididymal white adipose tissue (WAT) was verified during dissection (A). The concentration of IFN $\gamma$  (B), TGF $\beta$ 1 (C), MIP3 $\alpha$  (D), and IL17F (E) was measured by applying protein arrays. The percentage of CD45+ cells in Peyer's patches (F) and lymph nodes (G) was measured with FACS. The relative abundance of Bacteroides was assessed using qRT-PCR (H). Medium-chain fatty acids (MCFA) levels were measured in mice cecum content by applying cecum HPLC-MS/MS. The groups were compared using ANOVA followed up by Student's t-test with correction for multiple testing. Considering the correction  $p < 0.01$  was regarded statistically significant;  $n = 6-8$ . Error bars indicate  $\pm$ SEM.

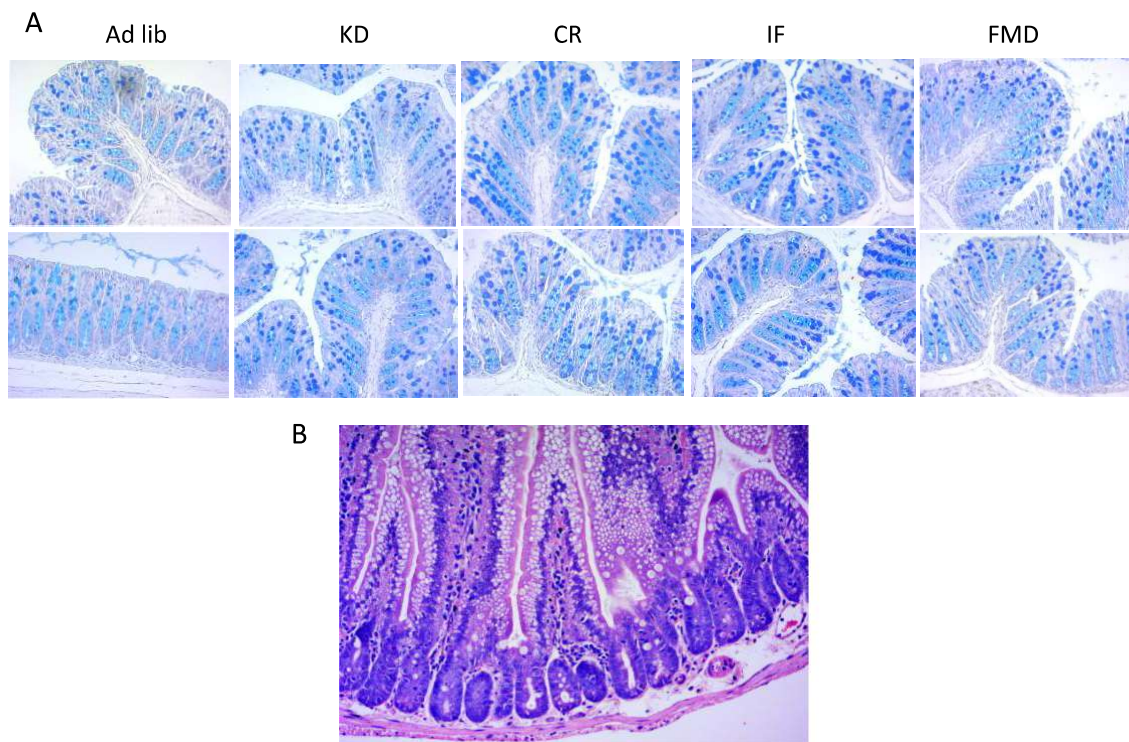

**Supplementary figure S2. Additional histology pictures.** Histology sections of the colon were stained with alcian blue periodic acid-Shiff (AB-PAS) to visualize goblet cells and mucus (A). Histological sections of jejunum were stained with hematoxylin-eosin (B).

## Supplementary tables

| Name                   | Forward                          | Reverse                     |
|------------------------|----------------------------------|-----------------------------|
| <i>Akkermansia</i>     | GCGTAGGCTGTTTCGTAAGTCGTGTGTGAAAG | GAGTGTTCCCGATATCTACGCATTTCA |
| <i>Atg7</i>            | GTTCGCCCCCTTTAATAGTGC            | TGAACTCCAACGTCAAGCGG        |
| <i>Atg12</i>           | TAGAGCGAACACGAACCATCC            | CACTGCCAAAACACTCATAGAGA     |
| <i>Catalase</i>        | CACTGCCAAAACACTCATAGAGA          | GTAGAATGTCCGCACCTGAG        |
| <i>Deferribacteres</i> | CTATTTCCAGTTGCTAACGG             | GAGATGCTTCCCTCTGATTATG      |
| <i>Firmicutes</i>      | TGAAACTYAAAGGAATTGACG            | ACCATGCACCACCTGTC           |
| <i>Gsta3</i>           | GTAGAATGTCCGCACCTGAG             | GCATGGCGGTACAAGCCTTT        |
| <i>Ifny</i>            | ATGAACGCTACACACTGCATC            | CCATCCTTTTGCCAGTTCTCTC      |
| <i>Irf1</i>            | CCCAGCTCTTGCTTTTCGGA             | AAGCCCAGTAGTTACACGACC       |
| <i>Lactobacillus</i>   | AGCAGTAGGGAATCTTCCA              | CACCGATACACATGGAG           |
| <i>Lc3</i>             | GTCCTGGACAAGACCAAGTTCC           | CCATTACCAGGAGGAAGAAGG       |
| <i>Il1α</i>            | CAAGATGGCCAAAGTTCGTGAC           | GTCTCATGAAGTGAGCCATAGC      |
| <i>Il1β</i>            | TCCTGTGTAATGAAAGACGGC            | GGTGCTGATGTACCAGTTGGG       |
| <i>Il6</i>             | TAGTCCTTCTACCCCAATTTCC           | TTGGTCCTTAGCCACTCCTTC       |
| <i>Il7</i>             | TCTGCTGCCTGTCACATCATC            | GGACATTGAATTCTTCACTGATATTCA |
| <i>Il33</i>            | TGAGACTCCGTTCTGGCCTC             | CTCTTCATGCTTGGTACCCGAT      |
| <i>Mgst1</i>           | CCTTCTCCCTGGATTCAATCAT           | TCGGCCATGCTTCCAATCTT        |
| <i>MnSOD</i>           | TGGCTTGGCTTCAATAAGGA             | AAGGTAGTAAGCGTGCTCCCACAC    |
| <i>Mt2</i>             | CCGCTATAAAGGTCGCGCT              | AGGAGCAGGATCCATCGGAG        |
| <i>mtDNA</i>           | CATCTGGTTCTACTTCAGGG             | TGAGTGTTAATAGGGTGATAGA      |
| <i>Muc2</i>            | CAAGGGCTCGGAACCTCCAG             | CCAGGGAATCGGTAGACATCG       |
| <i>Muc13</i>           | GCTACAGTGGAGTTGGCTGT             | GACGAATGCAATCACCAGGC        |
| <i>MyD88</i>           | GCACCTGTGTCTGGTCCATT             | TGTTGGACACCTGGAGACAG        |
| <i>Nod2</i>            | GGCAACAGTGTAGGTGATAAGGG          | TAGTGACTTGTTCTTCTCCAGCATC   |
| <i>Oas1a</i>           | ATGGAGCACGGACTCAGGA              | TCACACACGACATTGACGGC        |
| <i>Occludin</i>        | CCTCCAATGGCAAAGTGAAT             | CTCCCCACCTGTCGTGTAGT        |
| <i>Parasutterella</i>  | AACGTRTCCGCTCGTGGGGGAC           | CGGAATAGCTGGATCAGGCTTG      |
| <i>Pgc1α</i>           | GCGTCATTCCGGGAGACTGGAT           | CCAACCAGAGCAGCACACTCT       |
| <i>Reg3γ</i>           | CTCCCCACCTGTCGTGTAGT             | CTCCCCACCTGTCGTGTAGT        |
| <i>Rsad2</i>           | TGCTGGCTGAGAATAGCATTAGG          | GCTGAGTGCTGTTCCCATCT        |
| <i>Stat1</i>           | GCTGAGTGCTGTTCCCATCT             | AAGTCCTTCAGAGTAACAG         |
| <i>Tfam</i>            | TCCACAGAACAGCTACCCAA             | CCACAGGGCTGCAATTTTCC        |
| <i>Tgfβ1</i>           | CCACAGGGCTGCAATTTTCC             | CCACAGGGCTGCAATTTTCC        |
| <i>Tlr3</i>            | GTATTGCCTGGTTTGTTAATTGG          | AAGAGTTCAAAGGGGGCACT        |
| <i>Tnfα</i>            | CCACAGGGCTGCAATTTTCC             | CCACAGGGCTGCAATTTTCC        |
| <i>Trx2</i>            | GCTAGAGAAGATGGTCGCCAAGCAGCA      | TCCTCGTCCTTGATCCCCACAACTTG  |
| <i>Ucp2</i>            | CAGTTCTACACCAAGGGCTCAGAG         | TGACAATGGCATTACGGGCAACAT    |
| <i>Zo-1</i>            | CCACCTCTGTCCAGCTCTTC             | CACCGGAGTGATGGTTTTCT        |

**Supplementary table S1.** Primer sequence used during the study.
